# Supplementary material for: Rapid cloning, expression, and functional characterization of paired αβ and γδ T-cell receptor chains from single-cell analysis
Source: PubMed Central journal article supplement — Mol Ther Methods Clin Dev. 2016 Jan 27;3:15054–. doi: 10.1038/mtm.2015.54 (PMC4729322; doi:10.1038/mtm.2015.54), 2016-01-27
Supplement: mtm201554-s1.pdf [file mtm201554-s1.pdf]

|                            | Mean   | Std. Deviation | Std. Error |
|----------------------------|--------|----------------|------------|
| TRGV9/<br>TRDV2            | 20.06  | 16.11          | 4.306      |
| TRGV4/<br>TRDV1            | 12.71  | 15             | 4.008      |
| TRGV8/<br>TRDV1            | 8.714  | 10.63          | 2.842      |
| TRGV9/<br>TRDV3            | 8.357  | 21.25          | 5.68       |
| TRGV2/<br>TRDV1            | 7.836  | 14.61          | 3.906      |
| TRGV1/<br>TRDV2            | 4.643  | 13.51          | 3.61       |
| TRGV3/<br>TRDV3            | 4.35   | 13.09          | 3.498      |
| TRGV9/<br>TRDV1            | 4.279  | 8.702          | 2.326      |
| TRGV4/<br>TRDV3            | 4.071  | 9.059          | 2.421      |
| TRGV3/<br>TRDV1            | 4.029  | 5.646          | 1.509      |
| TRGV2/<br>TRDV3            | 3.071  | 8.801          | 2.352      |
| TRGV5/<br>TRDV3            | 2.643  | 6.744          | 1.802      |
| TRGV8/<br>TRDV2            | 1.971  | 5.388          | 1.44       |
| TRGV5/<br>TRDV1            | 1.871  | 3.633          | 0.9711     |
| TRGV2/<br>TRDV2            | 1.871  | 3.633          | 0.9711     |
| TRGV8/<br>TRDV3            | 1.643  | 4.557          | 1.218      |
| TRGV2/<br>TRAV29<br>/DV5   | 1.492  | 4.706          | 1.305      |
| TRGV3/<br>TRDV2            | 1.279  | 2.922          | 0.7808     |
| TRGV10<br>/TRDV1           | 1.071  | 2.31           | 0.6175     |
| TRGV9/<br>TRAV38<br>-2/DV8 | 0.3571 | 1.336          | 0.3571     |
| TRGV4/<br>TRDV2            | 0.1857 | 0.6949         | 0.1857     |
| TRGV9/<br>TRAV29<br>/DV5   | 0.1714 | 0.6414         | 0.1714     |

**Supplemental Table S1. TRGV/TRDV repertoire among 14 human samples.** The percentage of paired TRGV/TRDV usage was analyzed from the sequencing results of each 14 human PBMC samples. Average values, standard deviation and standard error were reported.

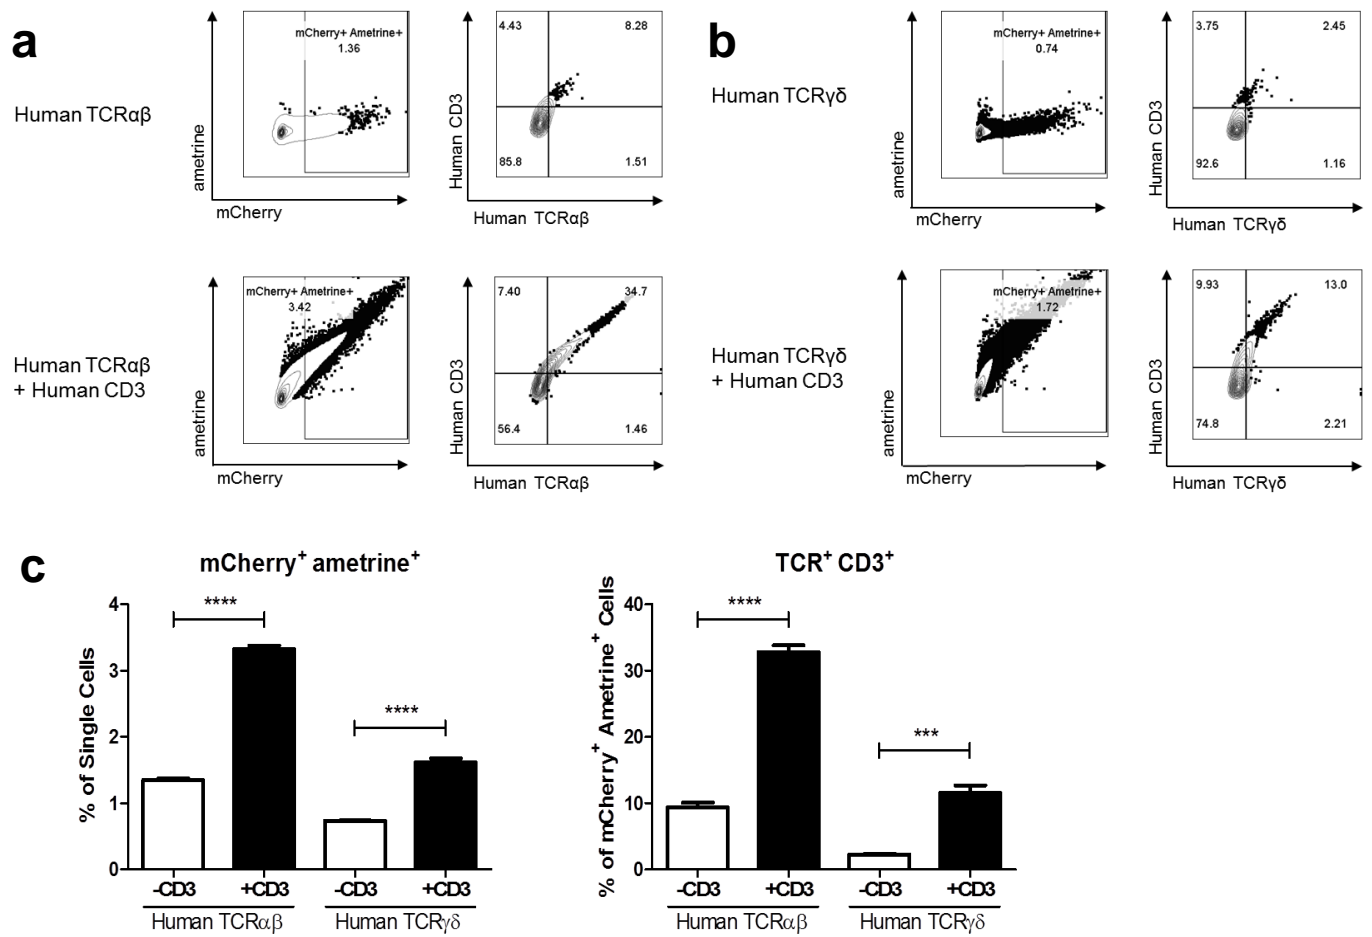

**Supplemental Figure S1. Co-transfection of human CD3 can improve the expression of human TCR constructs. (a-b)** Comparison of single transfection of human TCR constructs and co-transfection of human TCR constructs and human CD3. **(c)** Quantification of mCherry/ametrine and TCR/CD3 expression is shown. Statistical differences were determined by One-way ANOVA;  $p < 0.05$  was considered statistically significant. Data are mean  $\pm$  SEM of two independent experiments \*\*\* $p < 0.001$ , \*\*\*\* $p < 0.0001$ .

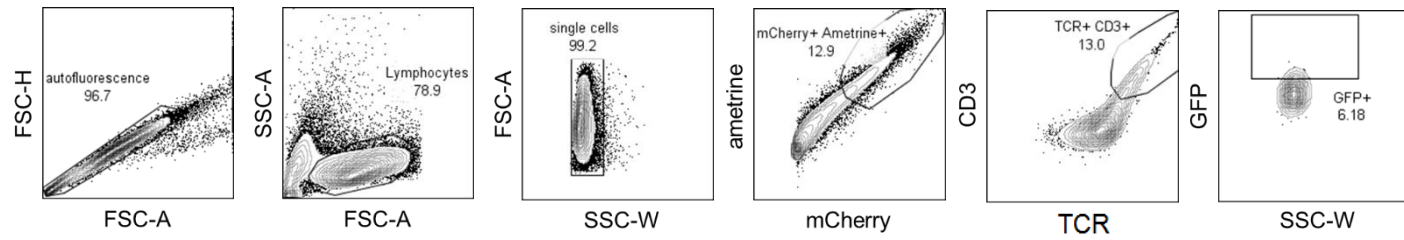

**Supplemental Figure S2. Gating strategy of TCR-transfected-NJ76 cells in flow cytometry.** The data of TCR-transfected-NJ76 cells after stimulation in Figure 3 were analyzed by applying the gating strategy to all the samples. The gating is flowing “autofluorescence gate – lymphocytes gate – single cell gate – mCherry<sup>+</sup>Ametrine<sup>+</sup> gate – TCR<sup>+</sup>CD3<sup>+</sup> gate – GFP<sup>+</sup> gate”.

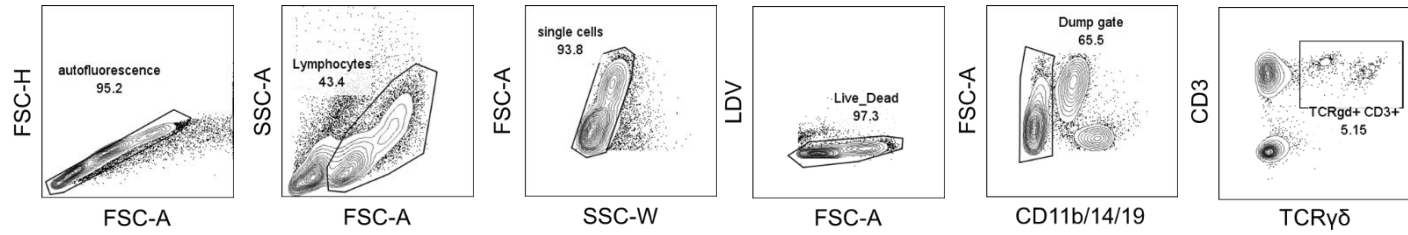

**Supplemental Figure S3. Gating strategy of Human TCR $\gamma/\delta^+$  CD3 $^+$  cells single cell sorting.** Single cell of human TCR $\gamma\delta^+$  CD3 $^+$  cells from PBMC samples were sorted into 96-well plate by applying the gating strategy above. The gating is flowing “autofluorescence gate – lymphocytes gate – single cell gate – live/dead gate – dump gate (CD11b/14/19) – TCR $\gamma\delta^+$ /CD3 $^+$  gate”.
